# Supplementary material for: Prognostic Implications of High-Degree Atrio-Ventricular Block in Patients with Acute Myocardial Infarction in the Contemporary Era
Source: MDPI journal article supplement (doi:10.3390/jcm12144834), 2023-07-22
Supplement: s1 [file s1]

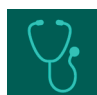

**Supplementary Materials:**

**Table S1.** Comparison between our results with previous studies.

| Authors                           | Incidence | Mean Age      | Type of ACS | Initial TIMI flow = 0 * | Type of AVB  | RCA involvement                     | Treatment                                                              |
|-----------------------------------|-----------|---------------|-------------|-------------------------|--------------|-------------------------------------|------------------------------------------------------------------------|
| DIAMANTE (n=1109)                 | 8.7%      | 64.0          | STEMI       | 70.2%                   | HAVB         | 42.1%                               | PCI (93.1%) and fibrinolysis (6.9%)                                    |
| Singh et al. [1] (n=59229)        | 2.9%      | 66.1          | All         | ---                     | HAVB         | 35.7%                               | Angiography (62.1%): PCI (86.3%), fibrinolysis (12.9%) and CABG (5.1%) |
| Gómez-Talavera et al. [2] (n=913) | 12.6%     | 63.2          | STEMI       | ---                     | All          | 41.9%                               | PCI                                                                    |
| Gang et al. [3] (n=2073)          | 3.2%      | 44%> 65 years | STEMI       | ---                     | HAVB         | 38.4%                               | PCI                                                                    |
| Auffret et al. [4] (n=6662)       | 3.5%      | 62.0          | STEMI       | 54.1%                   | HAVB         | 41.8%                               | Angiography (98.6%), PCI (74.0%), Fibrinolysis (12.4%)                 |
| Kosmidou et al. [5] (n=3115)      | 1.5%      | 59.9          | STEMI       | ---                     | HAVB         | 41.6%                               | PCI                                                                    |
| Aguiar Rosa et al. [6] (n=4799)   | 1.9%      | 63.7          | All         | ---                     | Complete AVB | Inferior STEMI (23.41%)             | In STEMI patients PCI (84.4%) and fibrinolysis (7.7%)                  |
| Kim KH et al. [7] (n=16536)       | 3.2%      | 66.2          | STEMI       | 57.8%                   | HAVB         | 37.0%                               | PCI                                                                    |
| Shacham et al. [8] (n=1244)       | 3.0%      | 62.0          | STEMI       | ---                     | HAVB         | ---                                 | PCI                                                                    |
| Santos H et al. [9] (n=32157)     | 2.6%      | 71            | All         | ---                     | HAVB         | 65.8%                               | PCI (85.7%), CABG (5.6%), hybrid strategy (2.6%)                       |
| Kawamura et al. [10] (n=1295)     | 6.3%      | 66            | STEMI       |                         | Complete ABV | Non-anterior STEMI (RCA or LCX) 51% | PCI 100%                                                               |

\* in all patients. ACS = acute coronary syndromes; TIMI = thrombolysis in myocardial infarction; STEMI = ST-elevation myocardial infarction; AVB = atrioventricular block; HAVB = high-degree atrioventricular block; PCI = percutaneous coronary intervention; CABG = coronary artery bypass surgery.
